# Supplementary figures and images for: Inclusion of Oat Polar Lipids in a Solid Breakfast Improves Glucose Tolerance, Triglyceridemia, and Gut Hormone Responses Postprandially and after a Standardized Second Meal: A Randomized Crossover Study in Healthy Subjects
Source: MDPI journal article supplement (doi:10.3390/nu15204389), 2023-10-16

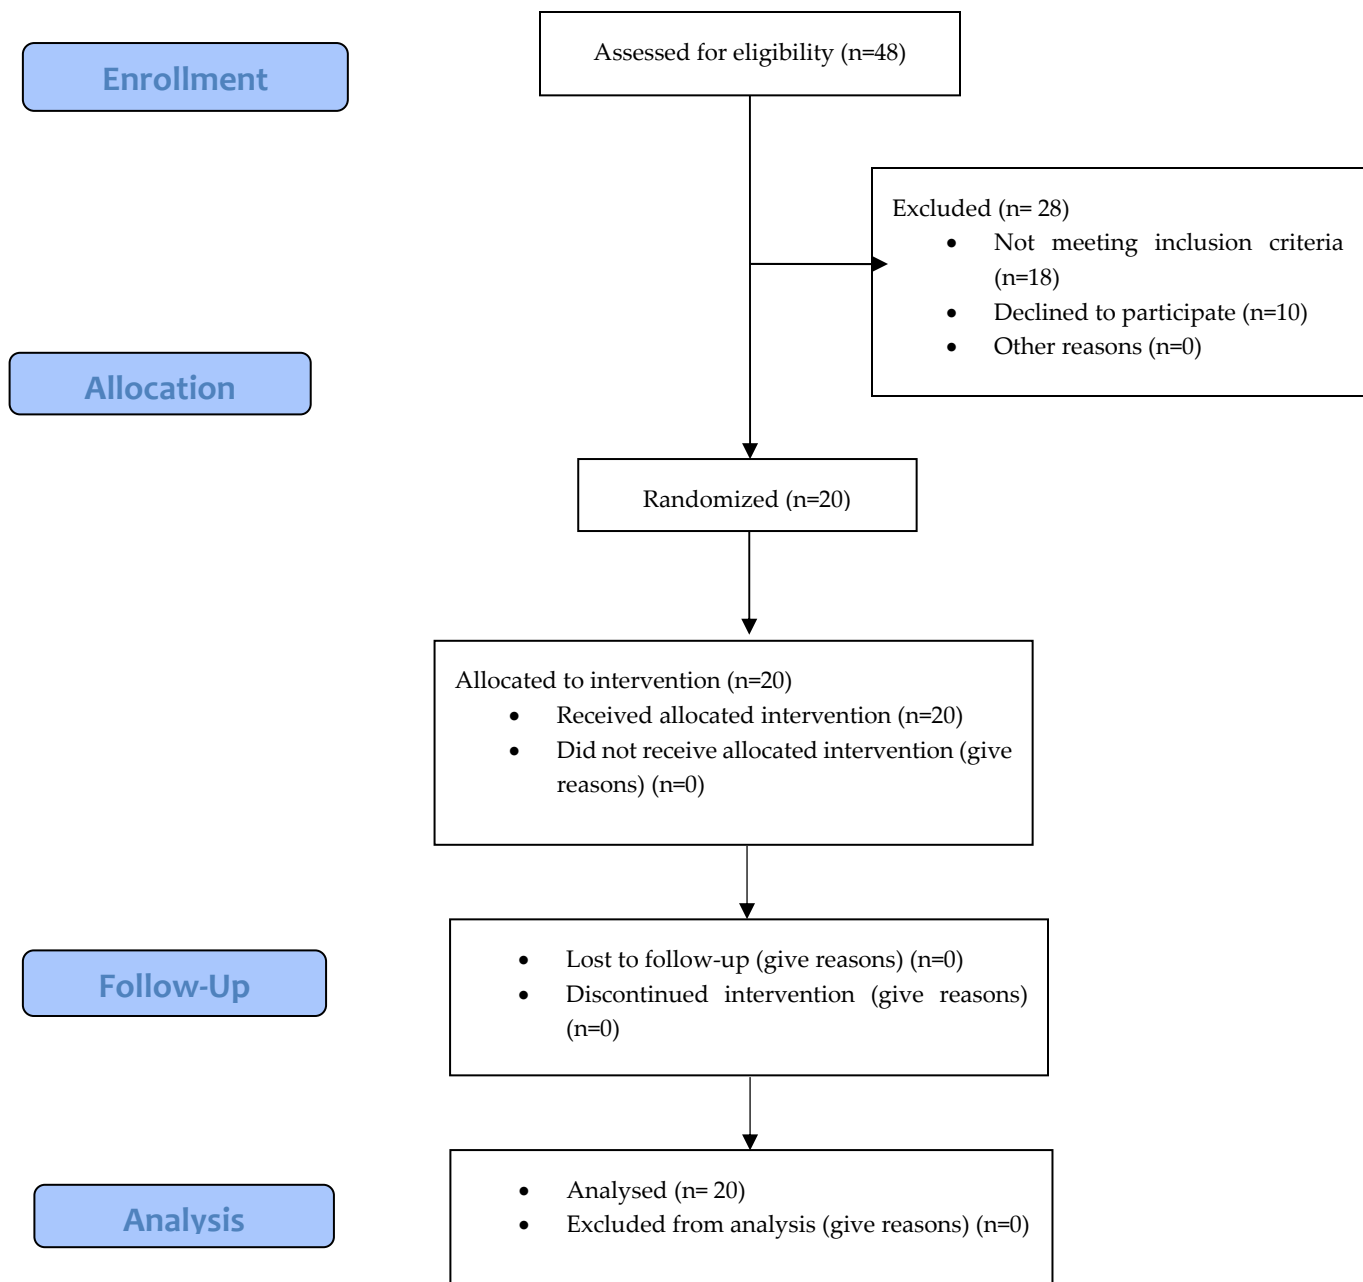

**Figure S1:** Flow diagram of the study progress

Supplement: s1 [file s1]
